# Supplementary material for: Synthesis of efficient N-containing TiO2photocatalysts with high anatase thermal stability and the effects of the nitrogen residue on the photoinduced charge separation
Source: Royal Society of Chemistry journal article supplement (doi:10.1039/c1cp22907a), 2011-12-10

# Synthesis of efficient N-containing TiO<sub>2</sub> photocatalyst with high anatase thermal stability and the effects of residue nitrogen on photoinduced charge separation

Yunbo Luan,<sup>ab</sup> Liqiang Jing,<sup>\*ab</sup> Mingzheng Xie,<sup>b</sup> Xin Shi,<sup>b</sup>

Xuxin Fan,<sup>b</sup> Yue Cao,<sup>b</sup> and Yujie Feng<sup>\*a</sup>

<sup>a</sup>State Key Lab of Urban Water Resource and Environment (Harbin Institute of Technology),

Harbin 150001, P. R. China. <sup>b</sup>Key Laboratory of Functional Inorganic Material Chemistry

(Heilongjiang University), Ministry of Education, School of Chemistry and Materials Science,

Harbin 150080, P. R. China.

**Supporting information (SI)-figure 1. XRD patterns of TiO<sub>2</sub> samples modified by different amount of HMT calcined at the temperature of 700 (A), 750 (B), 800 (C) and 900 □ (D)**

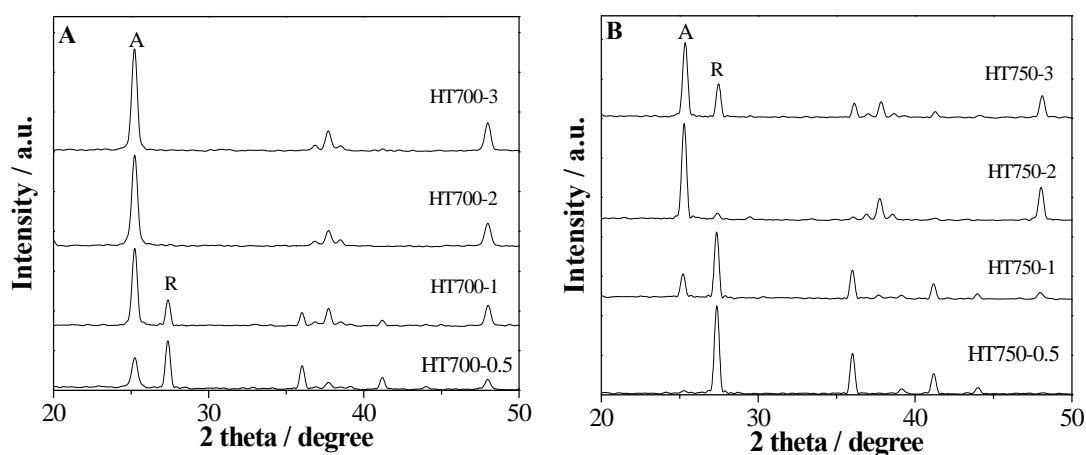

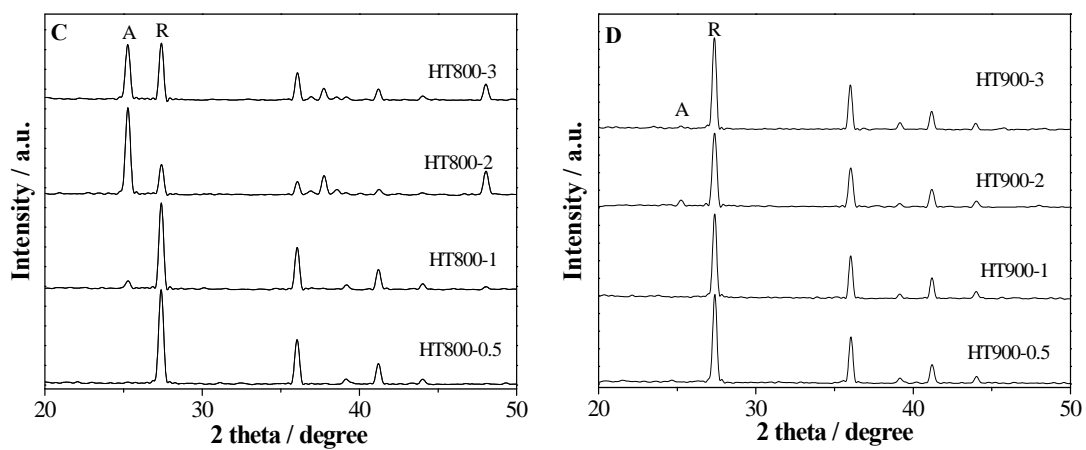

SI-figure 2. FT-IR spectra of T750 and HT750-2 samples

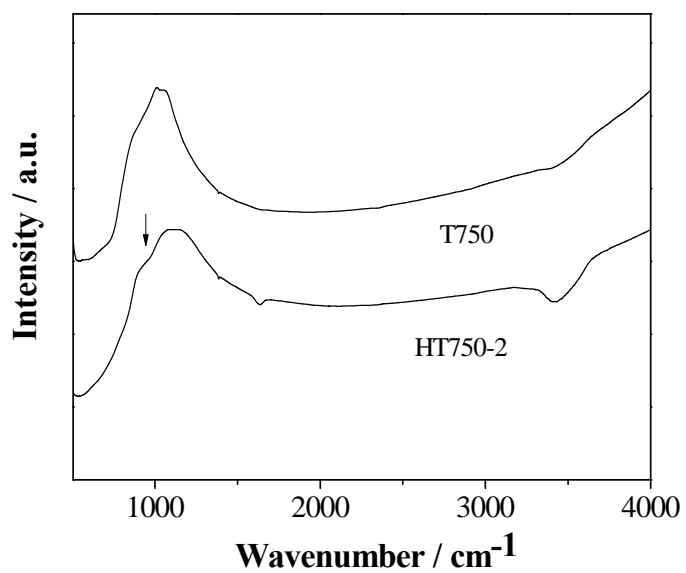

SI-figure 3. N1s XPS spectra of HT750-2 sample etched by Ar<sup>+</sup> sputtering for different time (a: 0 min, b:1 min, c: 5 min )

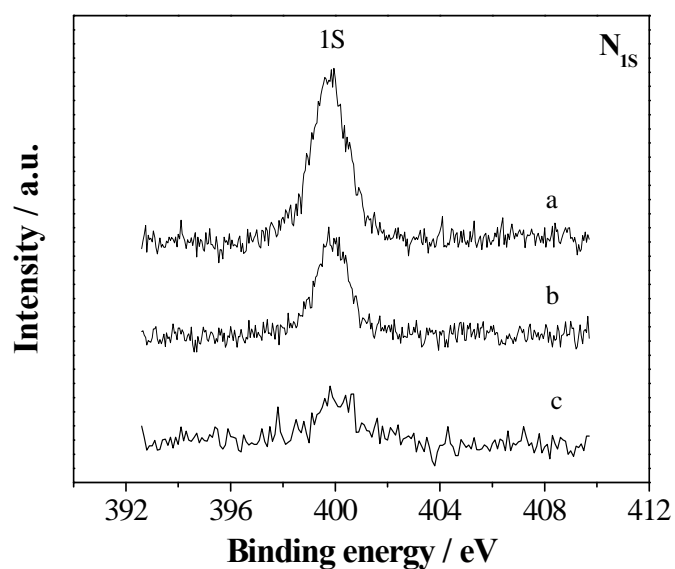

SI-figure 4. A schematic of phase transformation process of unmodified and modified TiO<sub>2</sub>

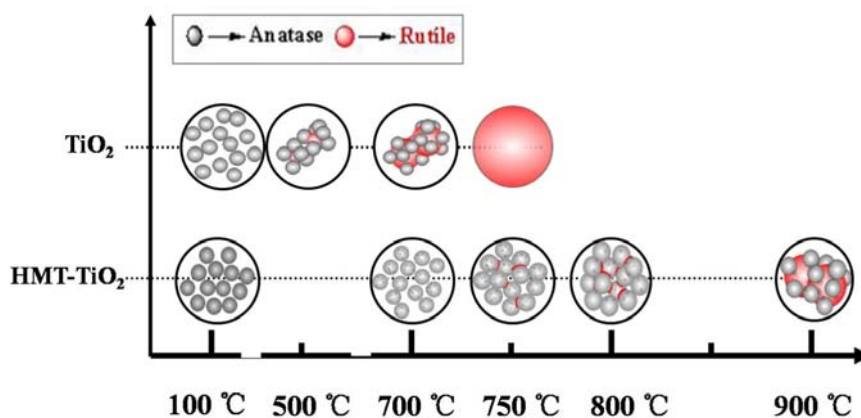

**SI-figure 5. XRD patterns of different TiO<sub>2</sub> samples by sol-gel process**

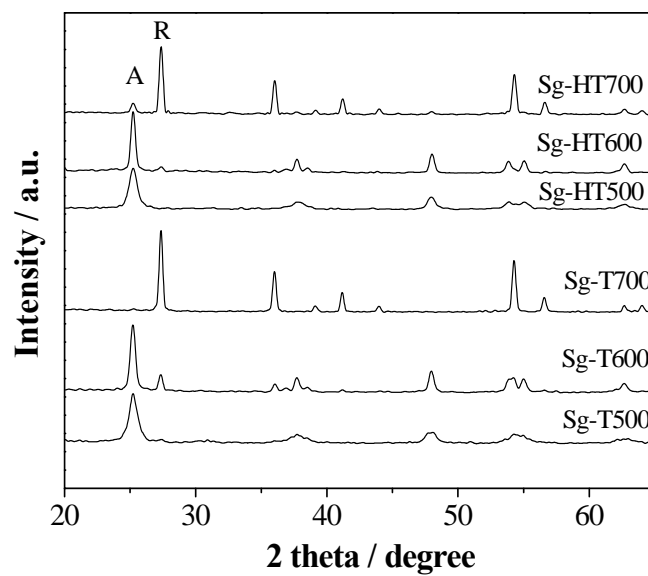

**SI-figure 6. XRD patterns of TiO<sub>2</sub> samples modified by ammonia**

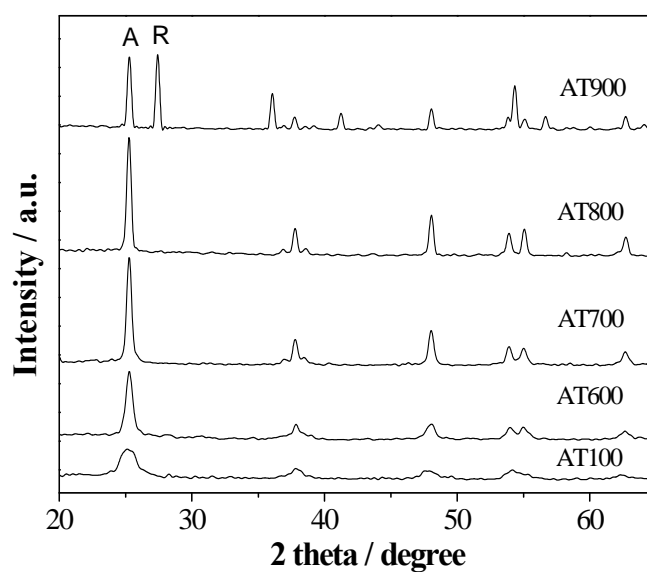

SI-figure 7. UV-vis diffuse reflection spectra of T500, T750 and HT750-2 samples

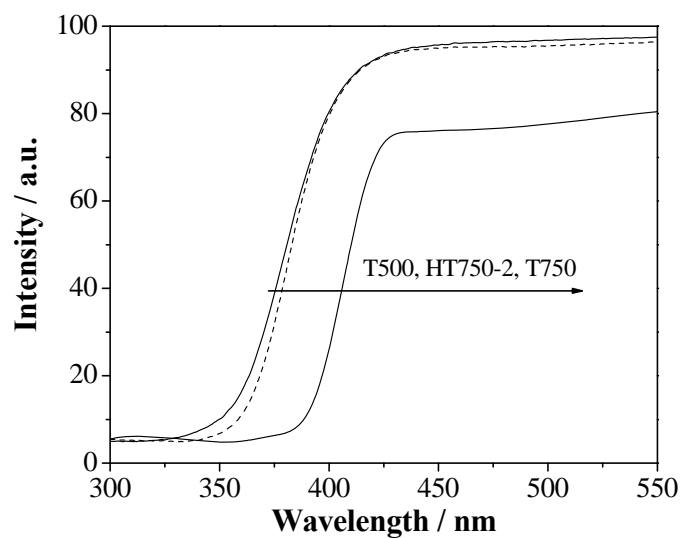

SI-figure 8. SPS responses of the T500 in different atmospheres (A) and SPS responses of the T500 in the oxygen gas at the aid of an outer electric field (B)

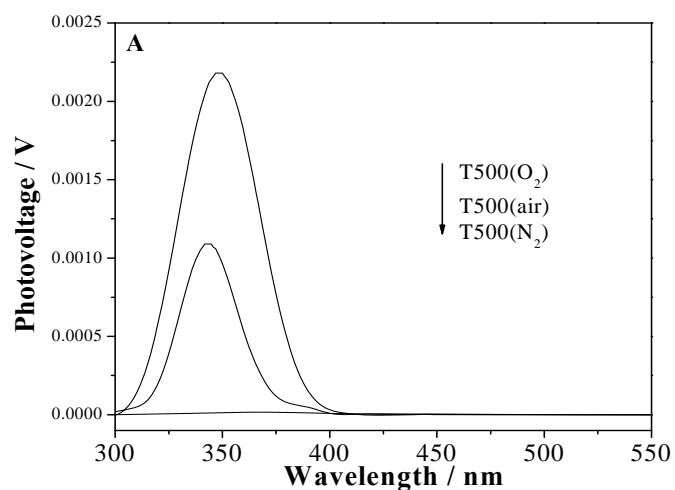

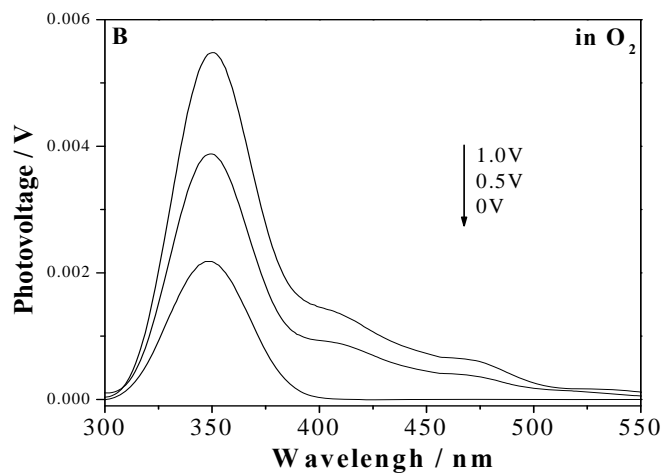

SI-figure 9. Photocatalytic degradation rates (A) and photocatalytic degradation evolution curves (B) of RhB solution on the different TiO<sub>2</sub> samples

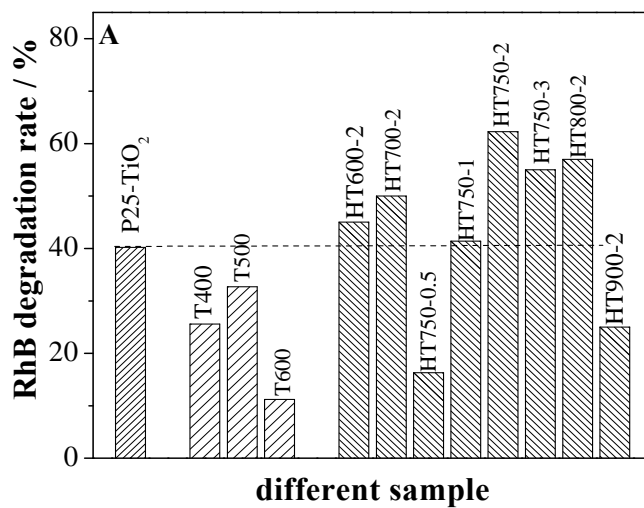

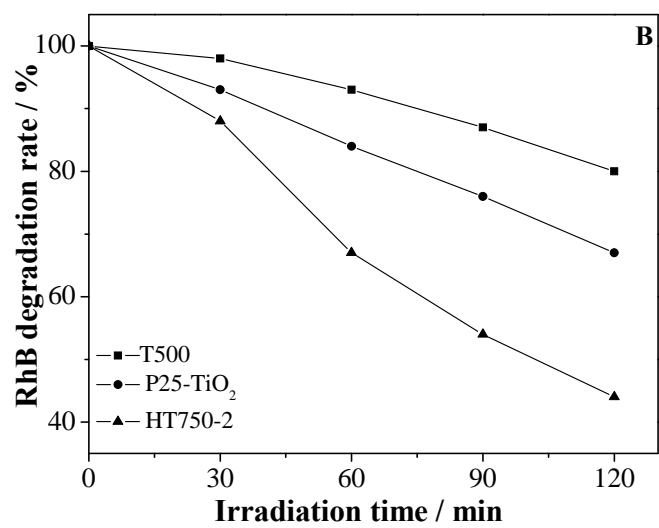

Supplement: c1cp22907a.pdf [file c1cp22907a.pdf]
